# Supplementary material for: Emerging role of oncogenic ß-catenin in exosome biogenesis as a driver of immune escape in hepatocellular carcinoma
Source: eLife journal article supplement (doi:10.7554/elife.95191), 2024-03-19

**Figure 2**

**e**

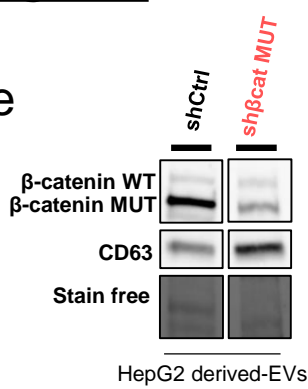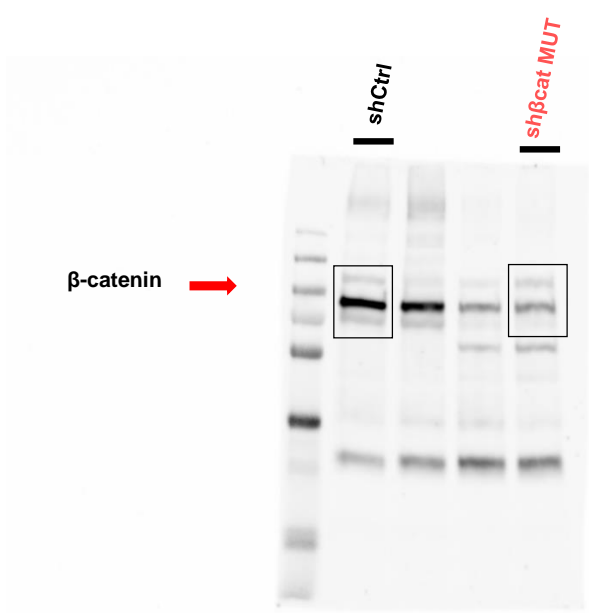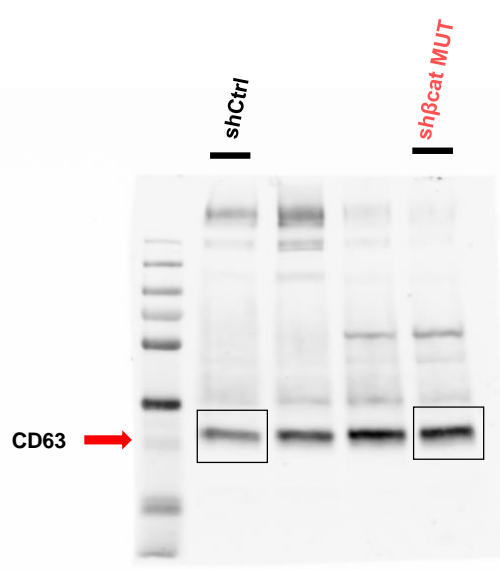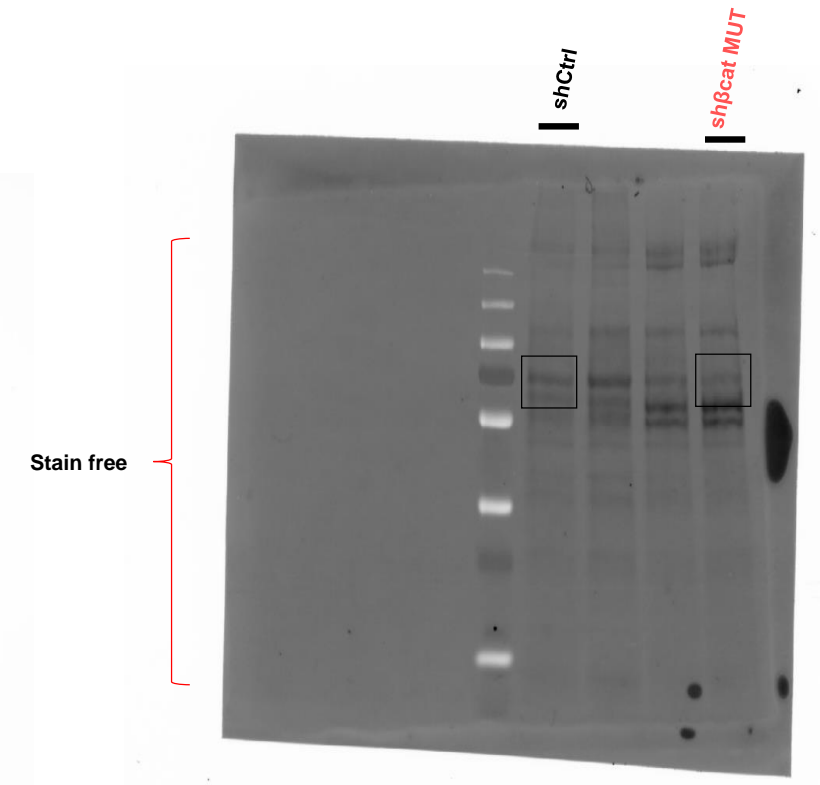

Supplement: fig2-data8 [file elife-95191-fig2-data8-v1.pdf]
