# Supplementary material for: Emerging role of oncogenic ß-catenin in exosome biogenesis as a driver of immune escape in hepatocellular carcinoma
Source: eLife journal article supplement (doi:10.7554/elife.95191), 2024-03-19

**Figure 3**

**g**

Rab27a   
Stain free 

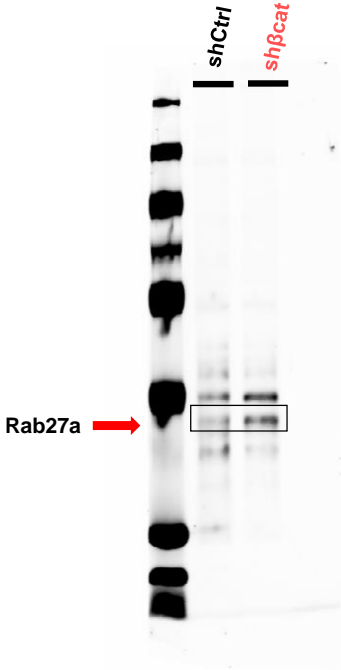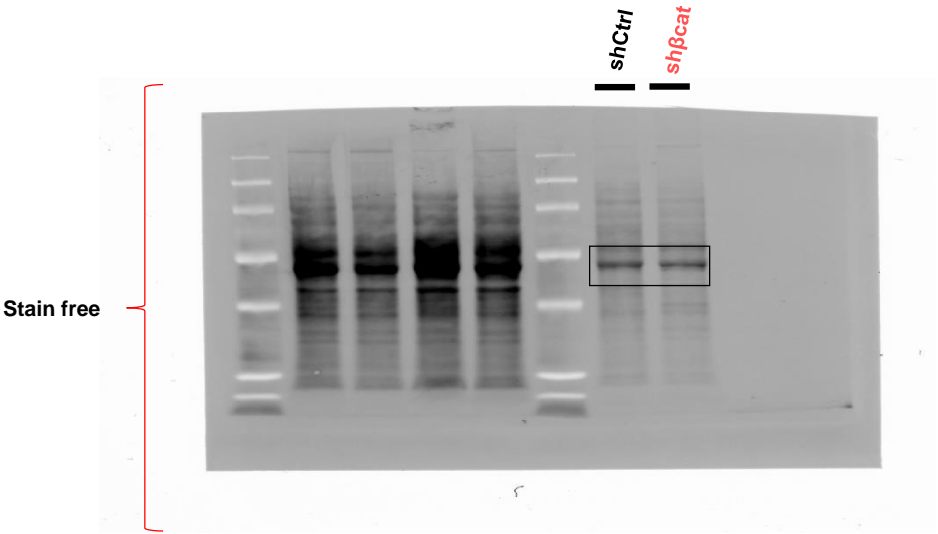

Supplement: fig3-data6 [file elife-95191-fig3-data6-v1.pdf]
