# Supplementary material for: Emerging role of oncogenic ß-catenin in exosome biogenesis as a driver of immune escape in hepatocellular carcinoma
Source: eLife journal article supplement (doi:10.7554/elife.95191), 2024-03-19

Figure 4—figure supplement 3

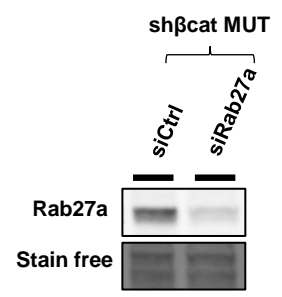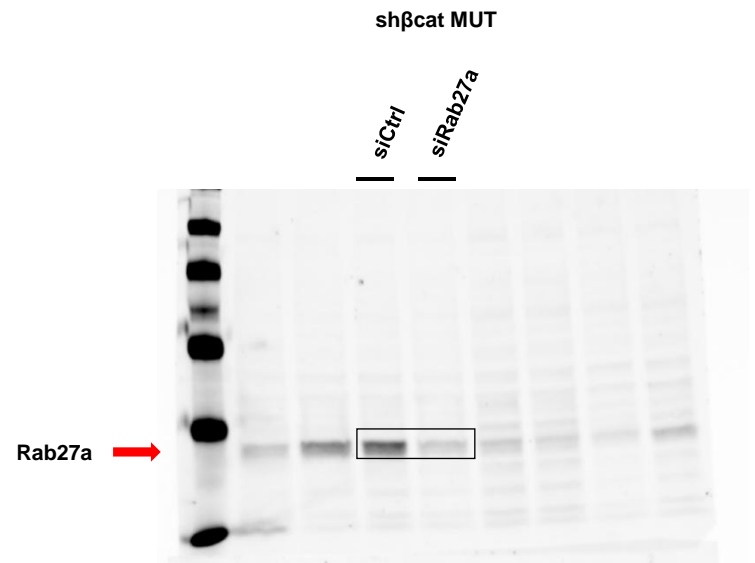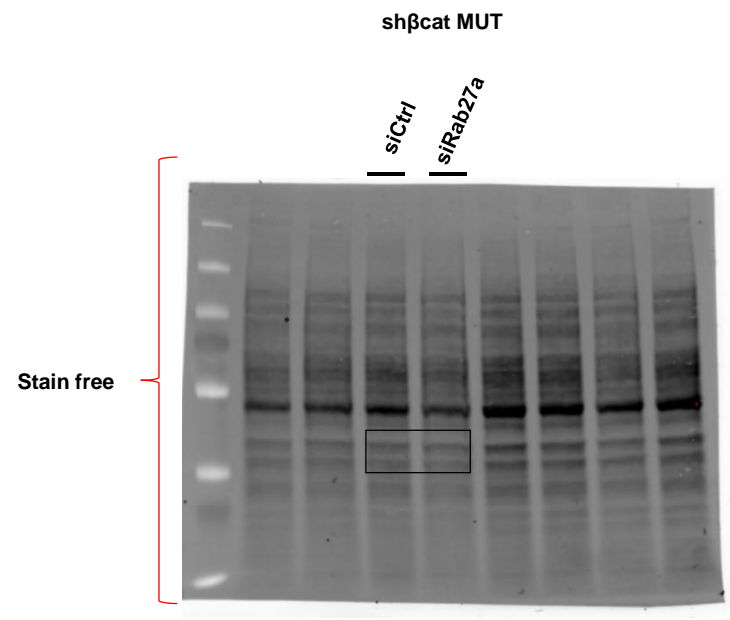

Supplement: fig4-figsupp3-data3 [file elife-95191-fig4-figsupp3-data3-v1.pdf]
